# Supplementary material for: Atherosclerosis-associated hepatic secretion of VLDL but not PCSK9 is dependent on cargo receptor protein Surf4
Source: PubMed Central journal article supplement (PMC8261665; doi:10.1016/j.jlr.2021.100091), 2021-06-09

# Figure 1

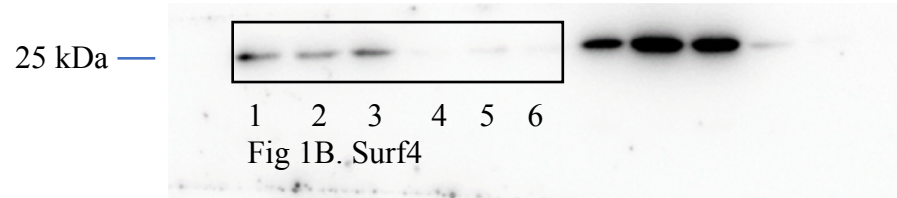

**Fig 1B. Surf4.** Whole liver lysate was subjected to WB. The membrane was blotted with an anti-Surf4 antibody. Antibody binding was detected using HRP-conjugated secondary antibodies. SDS-PAGE (12%).

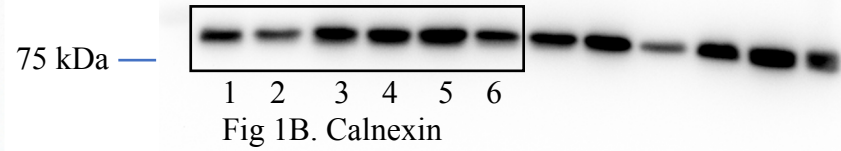

**Fig 1B. Calnexin.** Whole liver lysate was subjected to WB. The membrane was blotted with a rabbit anti-calnexin antibody. Antibody binding was detected using HRP-conjugated secondary antibodies. SDS-PAGE (12%).

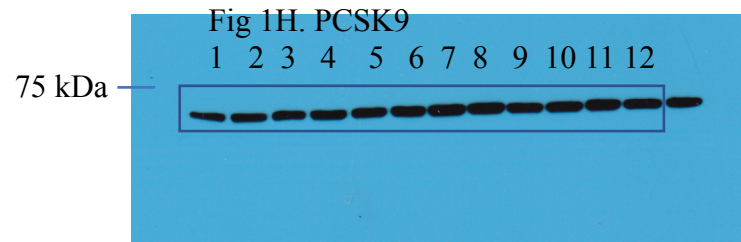

**Fig 1H. PCSK9.** The membrane was cut into halves. The top part was blotted with a rabbit anti-mouse PCSK9 antibody (abcam). Antibody binding was detected using HRP-conjugated secondary antibodies. SDS-PAGE (10%).

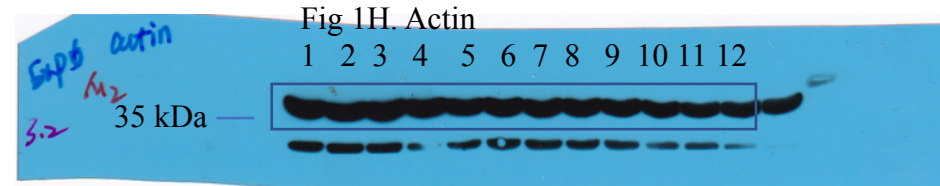

**Fig 1H. Actin.** The membrane was cut into halves. The bottom part was blotted with a rabbit anti-actin antibody (Bioss). Antibody binding was detected using HRP-conjugated secondary antibodies. SDS-PAGE (10%).

# Figure 1 K

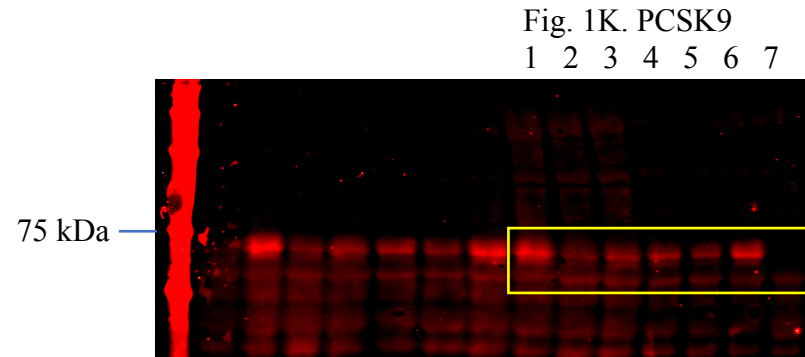

**Fig 1K. PCSK9.** The membrane was blotted with a rabbit anti-mouse PCSK9 antibody (abcam). Antibody binding was detected using IRDye680-Donkey anti-rabbit IgG. SDS-PAGE (8%).

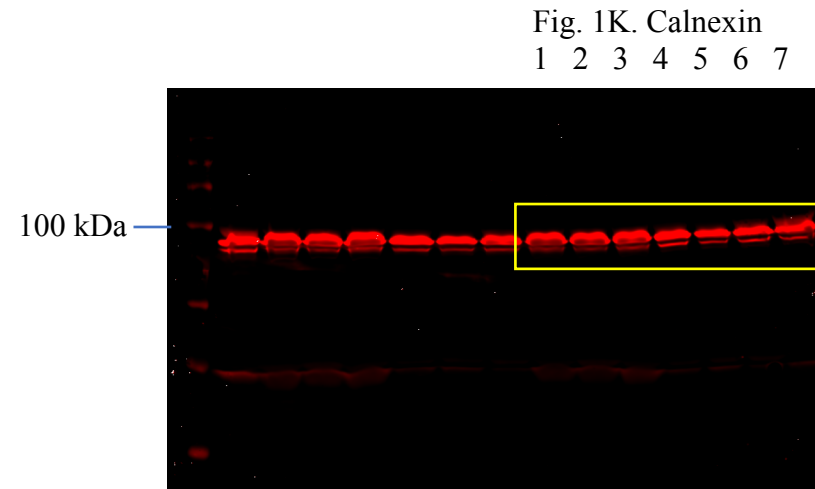

**Fig 1K. Calnexin.** The membrane was blotted with a rabbit anti-Calnexin antibody (abcam). Antibody binding was detected using IRDye680-Donkey anti-rabbit IgG. SDS-PAGE (80%).

# Figure 3B

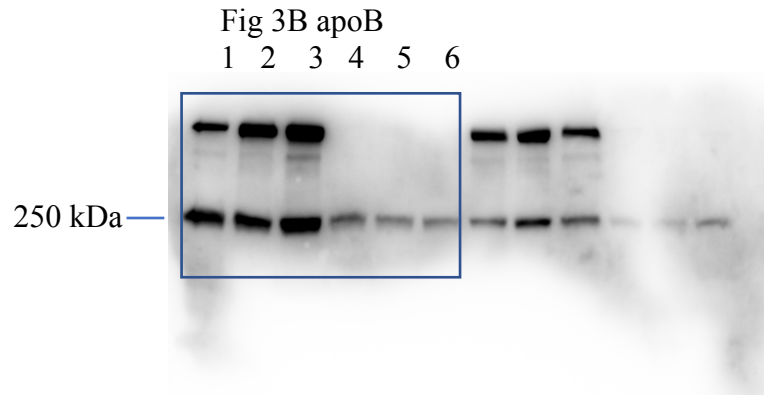

**Fig 3B. apoB.** The membrane was blotted with a rabbit anti-apoB antibody (abcam). SDS-PAGE (6%). Antibody binding was detected using HRP-conjugated secondary antibodies.

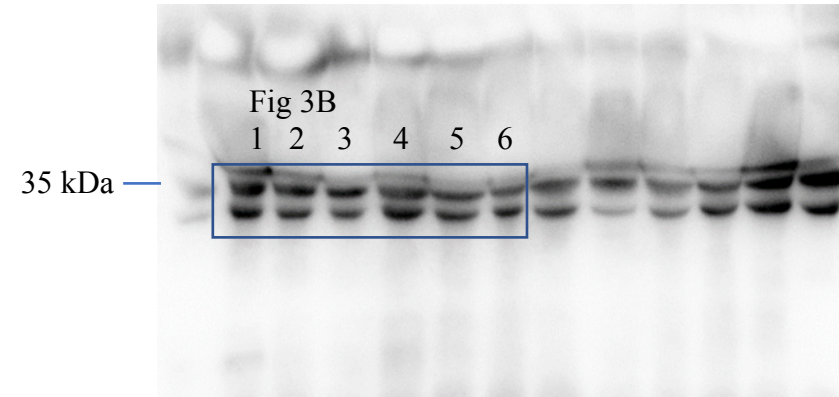

**Fig 3B. apoE.** The membrane was blotted with a mouse anti-apoE antibody (abcam). SDS-PAGE (10%). Antibody binding was detected using HRP-conjugated secondary antibodies.

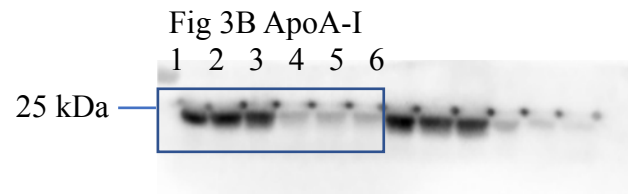

**Fig 3B. ApoA-I.** The membrane was blotted with a rabbit anti-apoA-I antibody (Bioss). SDS-PAGE (10%). Antibody binding was detected using HRP-conjugated secondary antibodies.

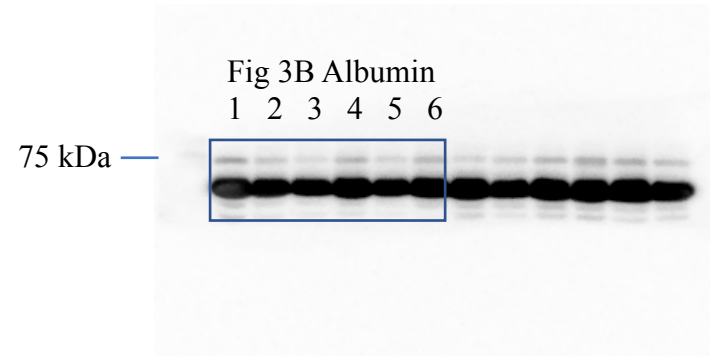

**Fig 3B. Albumin.** The membrane was blotted with a rabbit anti-albumin antibody (abcam). SDS-PAGE (10%). Antibody binding was detected using HRP-conjugated secondary antibodies.

# Figure 3 E

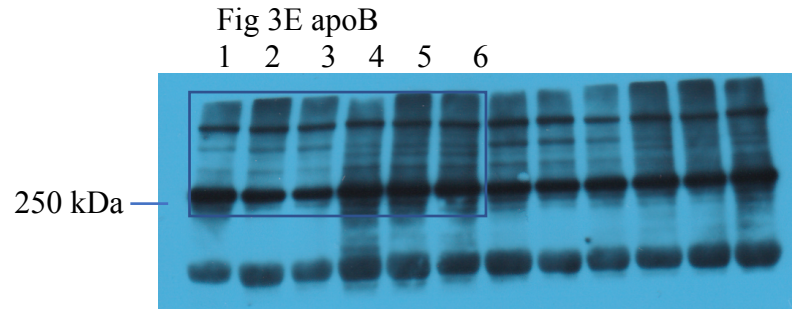

Fig 3E. apoB. The membrane was blotted with a rabbit anti-apoB antibody (abcam). SDS-PAGE (6%). Antibody binding was detected using HRP-conjugated secondary antibodies.

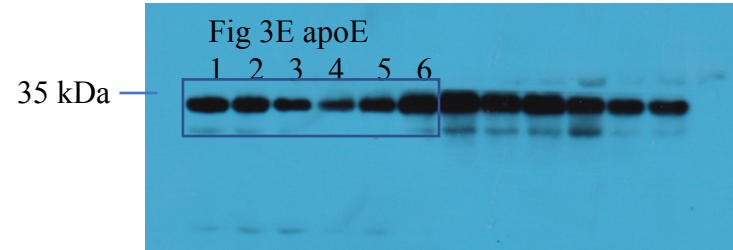

Fig 3E. apoE. The membrane was cut into halves. The bottom halves was blotted with a mouse anti-apoE antibody (abcam). SDS-PAGE (10%). Antibody binding was detected using HRP-conjugated secondary antibodies.

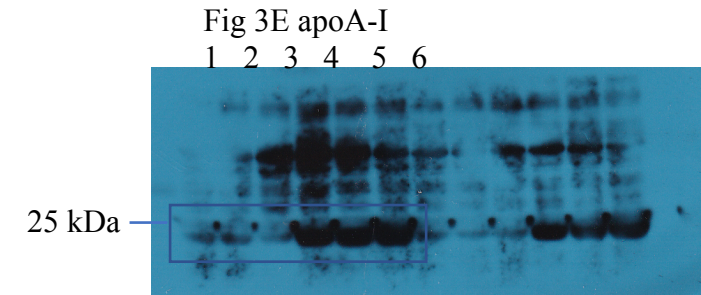

Fig 3E. apoA-I. The membrane was blotted with a mouse anti-apoA-I antibody (abcam). SDS-PAGE (10%). Antibody binding was detected using HRP-conjugated secondary antibodies.

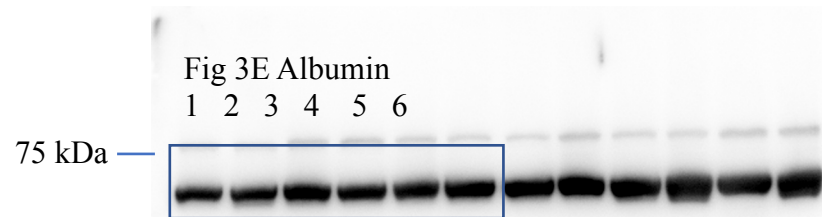

Fig 3E. Albumin. The membrane was blotted with a rabbit anti-albumin antibody (abcam). SDS-PAGE (10%). Antibody binding was detected using HRP-conjugated secondary antibodies.

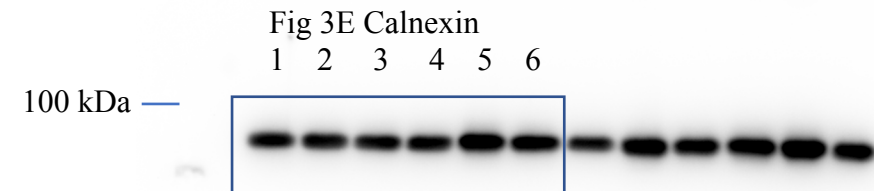

Fig 3E. Calnexin. The membrane was blotted with a rabbit anti-Calnexin antibody (abcam). SDS-PAGE (10%). Antibody binding was detected using HRP-conjugated secondary antibodies.



# Figure 3 G

Fig 3G MTP

1 2 3 4 5 6

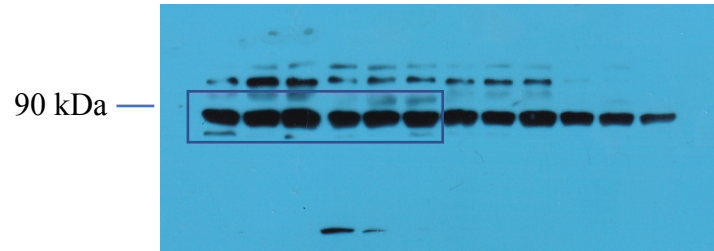

Fig 3G. MTP. The membrane was blotted with a rabbit anti-MTP antibody (Bioworld). SDS-PAGE (8%). Antibody binding was detected using HRP-conjugated secondary antibodies.

Fig 3G LDLR

1 2 3 4 5 6

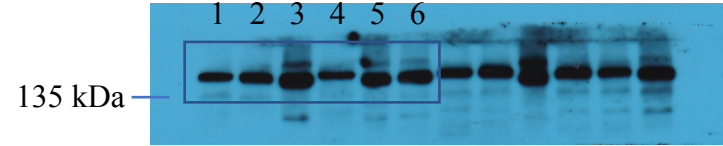

Fig 3G. LDLR. The membrane was cut into halves. The top part was blotted with a rabbit anti-LDLR antibody (abcam). SDS-PAGE (8%). Antibody binding was detected using HRP-conjugated secondary antibodies.

Fig 3G ABCA1

1 2 3 4 5 6

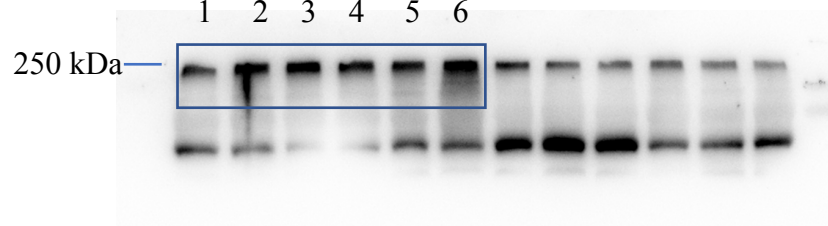

Fig 3G. ABCA1. The membrane was blotted with an anti-ABCA1 antibody. SDS-PAGE (8%). Antibody binding was detected using HRP-conjugated secondary antibodies.

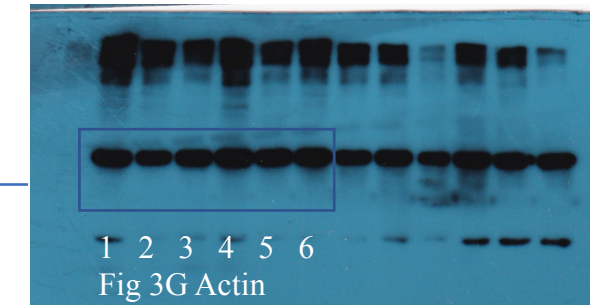

Fig 3G. Actin. The membrane was blotted with a rabbit anti-actin antibody (Bioss). Antibody binding was detected using HRP-conjugated secondary antibodies. SDS-PAGE (10%).

# Figure 4 A-whole cell lysate-Huh7

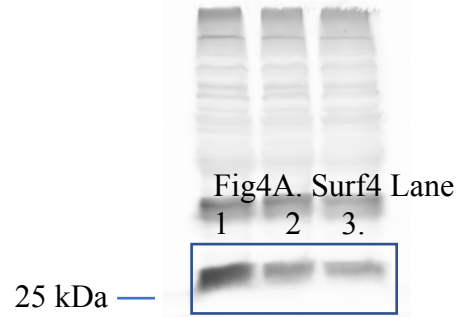

**Fig 4A. Huh7 whole cell lysate Surf4.** The membrane was blotted with an anti-Surf4 antibody. Antibody binding was detected using IRDye<sup>®</sup>680 or IRDye<sup>®</sup>800-labeled donkey anti-mouse, rabbit, or goat IgG (Li-Cor), followed by imaging on a Licor Odyssey Infrared Imaging System (Li-Cor). SDS-PAGE (10%).

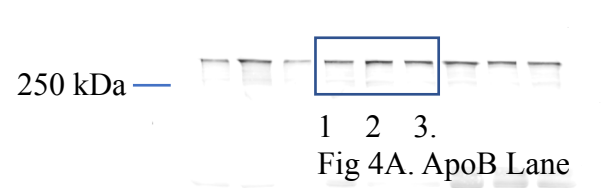

**Fig 4A. Huh7 whole cell lysate ApoB.** The membrane was cut into halves. The top part was blotted with a goat anti-apoB antibody (Millipore Sigma). Antibody binding was detected using IRDye<sup>®</sup>680 or IRDye<sup>®</sup>800-labeled donkey anti-mouse, rabbit, or goat IgG (Li-Cor), followed by imaging on a Licor Odyssey Infrared Imaging System (Li-Cor). SDS-PAGE (6%).

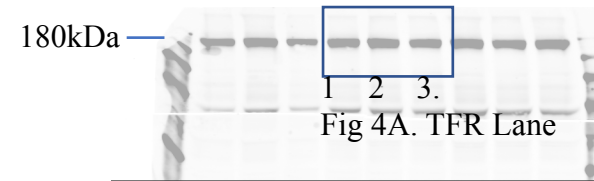

**Fig 4A. Huh7 whole cell lysate TFR.** The membrane was cut into halves. The top part was blotted with a mouse anti-transferrin receptor (TFR) antibody (BD Biosciences). Antibody binding was detected using IRDye<sup>®</sup>680 or IRDye<sup>®</sup>800-labeled donkey anti-mouse, rabbit, or goat IgG (Li-Cor), followed by imaging on a Licor Odyssey Infrared Imaging System (Li-Cor). SDS-PAGE (8%).

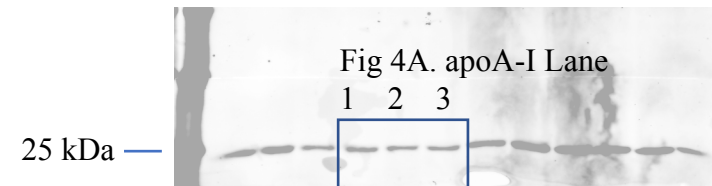

**Fig 4A. Huh7 whole cell lysate ApoA-I.** The membrane was cut into halves. The bottom part was blotted with a mouse anti-apoA-I antibody (Cell signaling). Antibody binding was detected using IRDye<sup>®</sup>680 or IRDye<sup>®</sup>800-labeled donkey anti-mouse, rabbit, or goat IgG (Li-Cor), followed by imaging on a Licor Odyssey Infrared Imaging System (Li-Cor). SDS-PAGE (12%).

# Figure 4 A-Culture medium-Huh7

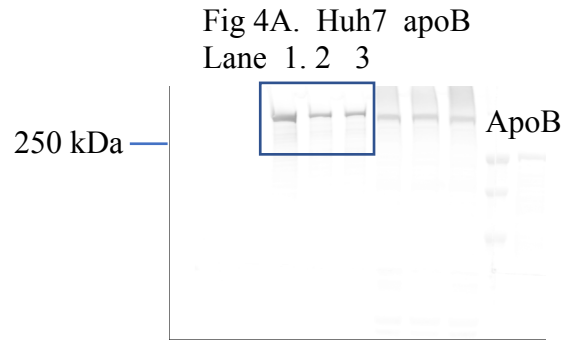

**Fig. 4A. Huh7 medium apoB.** The membrane was cut into halves. The top part was blotted with a goat-anti apoB antibody (Millipore Sigma). Antibody binding was detected using IRDye<sup>®</sup>800-labeled donkey anti-goat IgG (Li-Cor), followed by imaging on a Licor Odyssey Infrared Imaging System (Li-Cor). SDS-PAGE (6%).

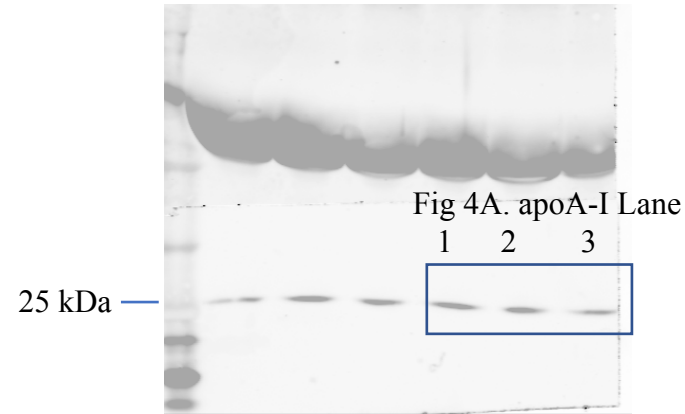

**Fig. 4A. Huh7-medium apoA-I.** The membrane was cut into halves. The bottom part was blotted with a mouse anti apoA-I antibody (Cell signaling). Antibody binding was detected using IRDye<sup>®</sup>680-labeled donkey anti-mouse IgG (Li-Cor), followed by imaging on a Licor Odyssey Infrared Imaging System (Li-Cor). SDS-PAGE (12%).

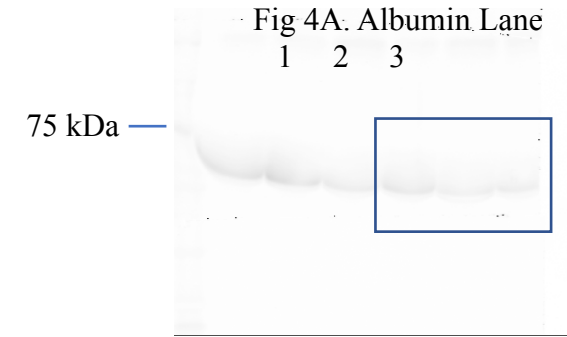

**Fig. 4A Huh7 medium albumin.** The membrane was cut into halves. The top part was blotted with a rabbit anti-albumin antibody (abcam). Antibody binding was detected using IRDye<sup>®</sup>680-labeled donkey anti-rabbit IgG (Li-Cor), followed by imaging on a Licor Odyssey Infrared Imaging System (Li-Cor). SDS-PAGE (12%).

# Figure 4 A-whole cell lysate-HepG2

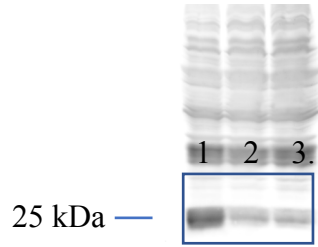

**Fig. 4A. HepG2 whole cell lysate Surf4.** The membrane was blotted with an anti-Surf4 antibody. Antibody binding was detected using IRDye<sup>®</sup>680 or IRDye<sup>®</sup>800-labeled donkey anti-mouse, rabbit, or goat IgG (Li-Cor), followed by imaging on a Licor Odyssey Infrared Imaging System (Li-Cor). SDS-PAGE (10%).

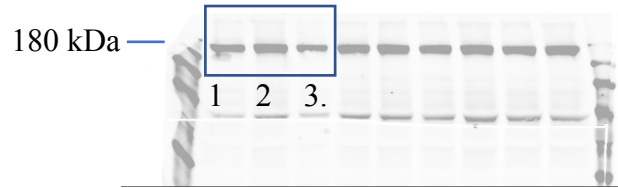

**Fig. 4A. HepG2 whole cell lysate TFR.** The membrane was cut into halves. The top part was blotted with a mouse anti-transferrin receptor (TFR) antibody (BD Biosciences). Antibody binding was detected using IRDye<sup>®</sup>680 or IRDye<sup>®</sup>800-labeled donkey anti-mouse, rabbit, or goat IgG (Li-Cor), followed by imaging on a Licor Odyssey Infrared Imaging System (Li-Cor). SDS-PAGE (8%).

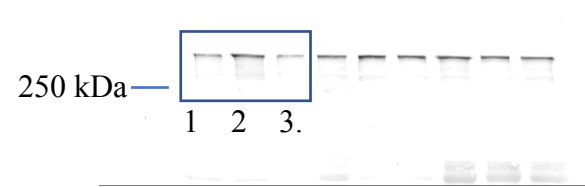

**Fig. 4A. HepG2-apoB.** The membrane was cut into halves. The top part was blotted with a goat anti-apoB antibody (Millipore Sigma). Antibody binding was detected using IRDye<sup>®</sup>680 or IRDye<sup>®</sup>800-labeled donkey anti-mouse, rabbit, or goat IgG (Li-Cor), followed by imaging on a Licor Odyssey Infrared Imaging System (Li-Cor). SDS-PAGE (6%).

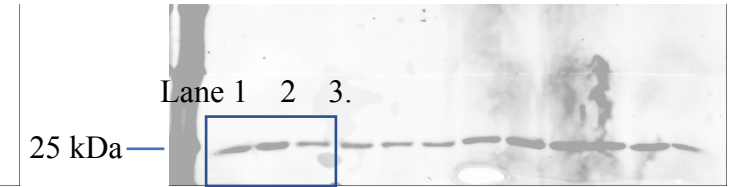

**Fig. 4A. HepG2-apoA-I.** The membrane was cut into halves. The bottom part was blotted with a mouse anti-apoA-I antibody (Cell signaling). Antibody binding was detected using IRDye<sup>®</sup>680 or IRDye<sup>®</sup>800-labeled donkey anti-mouse, rabbit, or goat IgG (Li-Cor), followed by imaging on a Licor Odyssey Infrared Imaging System (Li-Cor). SDS-PAGE (12%).

# Figure 4 A-Medium-HepG2

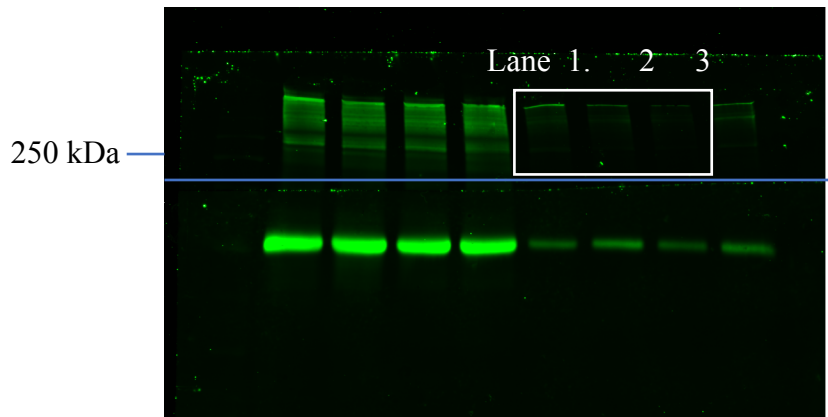

**Fig 4A. HepG2 medium apoB.** The membrane was cut into halves. The top part was blotted with a goat-anti apoB antibody (Millipore Sigma). Antibody binding was detected using IRDye<sup>®</sup>800-labeled donkey anti-goat IgG (Li-Cor), followed by imaging on a Licor Odyssey Infrared Imaging System (Li-Cor). SDS-PAGE (6%).

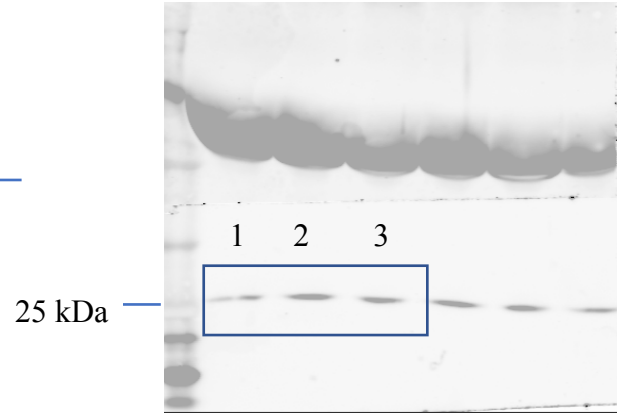

**Fig. 4A. HepG2-medium apoA-I.** The membrane was cut into halves. The bottom part was blotted with a mouse anti apoA-I antibody (Cell signaling). Antibody binding was detected using IRDye<sup>®</sup>680-labeled donkey anti-mouse IgG (Li-Cor), followed by imaging on a Licor Odyssey Infrared Imaging System (Li-Cor). SDS-PAGE (12%).

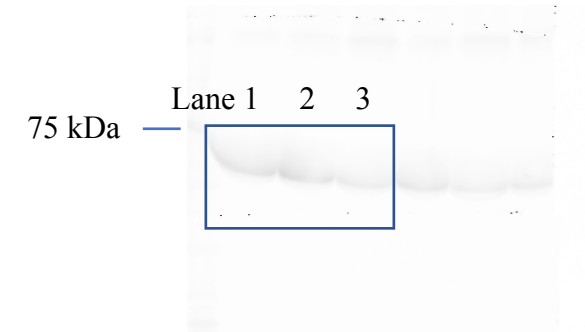

**Fig. 4A. HepG2 medium albumin.** The membrane was cut into halves. The top part was blotted with a rabbit anti-albumin antibody (abcam). Antibody binding was detected using IRDye<sup>®</sup>680-labeled donkey anti-rabbit IgG (Li-Cor), followed by imaging on a Licor Odyssey Infrared Imaging System (Li-Cor). SDS-PAGE (12%).



# Figure 4 D-Huh7

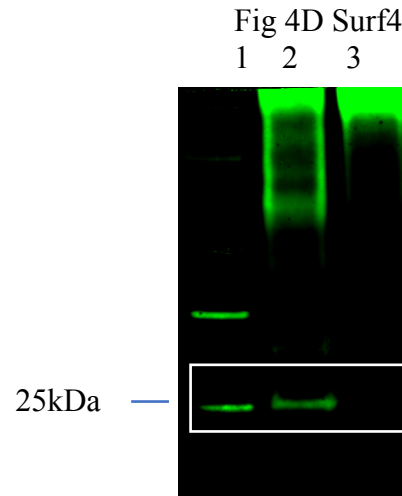

**Fig 4D. Surf4.** IP samples from Huh7 were subjected to SDS-PAGE (12%). The membrane was blotted with an anti-Surf4 antibody (Green). Antibody binding was detected using IRDye<sup>®</sup>800-labeled donkey anti-rabbit (Li-Cor), followed by imaging on a Licor Odyssey Infrared Imaging System (Li-Cor).

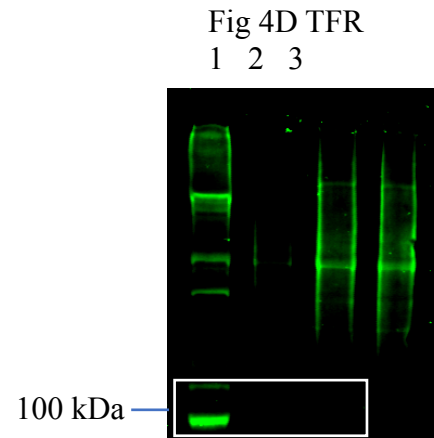

**Fig. 4D. Transferrin receptor (TFR).** IP samples from Huh7 cells were subjected to SDS-PAGE (4-12 %). The membrane was cut into halves. The top part was blotted with an anti-transferrin receptor antibody (TFR, BD Biosciences). Antibody binding was detected using IRDye<sup>®</sup>800-labeled donkey anti-mouse IgG (Li-Cor), followed by imaging on a Licor Odyssey Infrared Imaging System (Li-Cor).

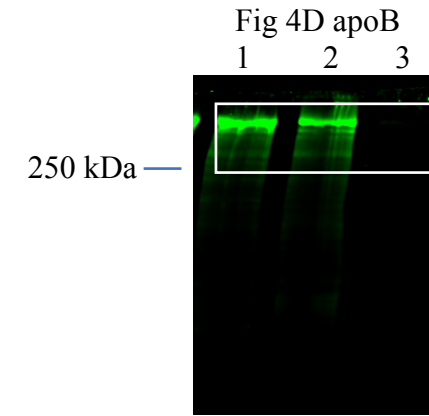

**Fig 4D. apoB.** IP samples from Huh7 cells were subjected to SDS-PAGE (6%). The membrane was cut into halves. The top part was blotted with a goat anti-apoB antibody (Millipore Sigma). Antibody binding was detected using IRDye<sup>®</sup>680 labeled donkey anti-goat IgG (Li-Cor), followed by imaging on a Licor Odyssey Infrared Imaging System (Li-Cor).

# Figure 4 D-HepG2

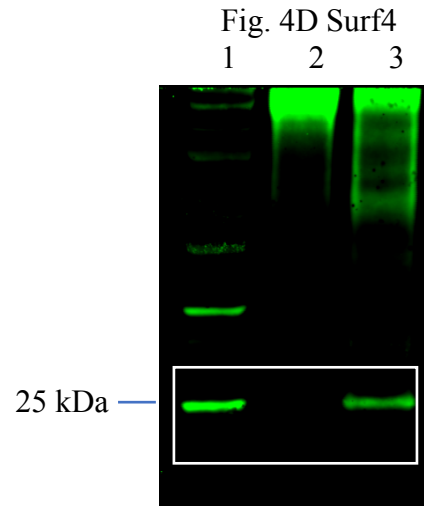

**Fig. 4D. Surf4.** IP samples from HepG27 were subjected to SDS-PAGE (12%). The membrane was blotted with an anti-Surf4 antibody (Green). Antibody binding was detected using IRDye<sup>®</sup>800-labeled donkey anti-rabbit (Li-Cor), followed by imaging on a Licor Odyssey Infrared Imaging System (Li-Cor).

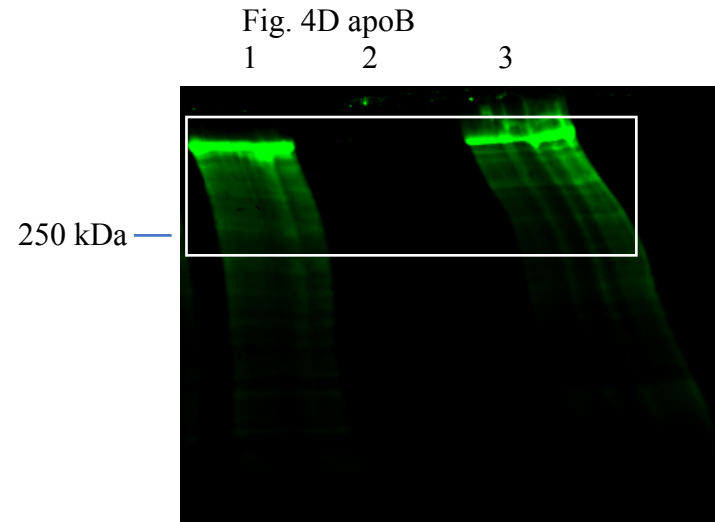

**Fig. 4D. apoB.** IP samples from HepG2 were subjected to SDS-PAGE (6%). The membrane was cut into halves. The top part was blotted with a goat anti-apoB antibody (Millipore Sigma). Antibody binding was detected using IRDye<sup>®</sup>680 labeled donkey anti-goat IgG (Li-Cor), followed by imaging on a Licor Odyssey Infrared Imaging System (Li-Cor).

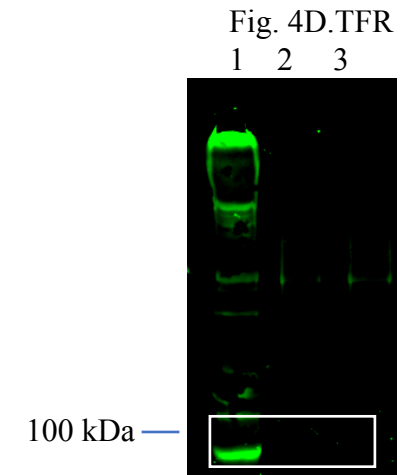

**Fig. 4D. Transferrin receptor (TFR).** IP samples from HepG2 were subjected to SDS-PAGE (4-12%). The membrane was cut into halves. The top part was blotted with an anti-transferrin receptor antibody (TFR, BD Biosciences). Antibody binding was detected using IRDye<sup>®</sup>800-labeled donkey anti-mouse IgG (Li-Cor), followed by imaging on a Licor Odyssey Infrared Imaging System (Li-Cor).

# Figure 6F

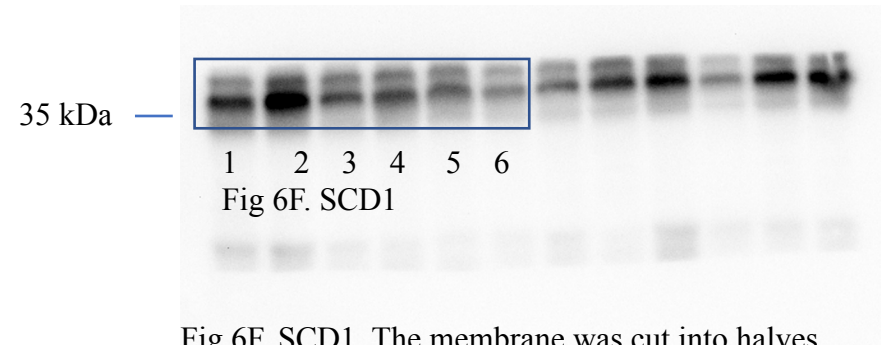

Fig 6F. SCD1. The membrane was cut into halves. The bottom part was blotted with a mouse anti-SCD1 antibody (abcam). Antibody binding was detected using HRP-conjugated secondary antibodies. SDS-PAGE (10%).

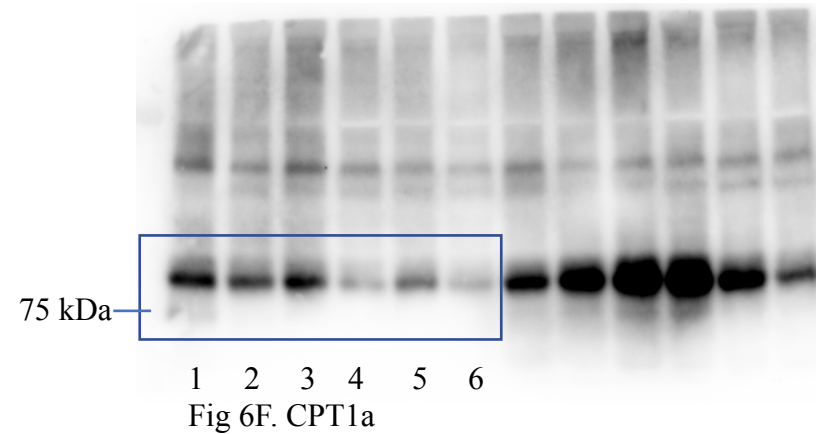

Fig 6F. CPT1a. The membrane was cut into halves. The bottom part was blotted with a mouse anti-CPT1a antibody (abcam). Antibody binding was detected using HRP-conjugated secondary antibodies. SDS-PAGE (10%).

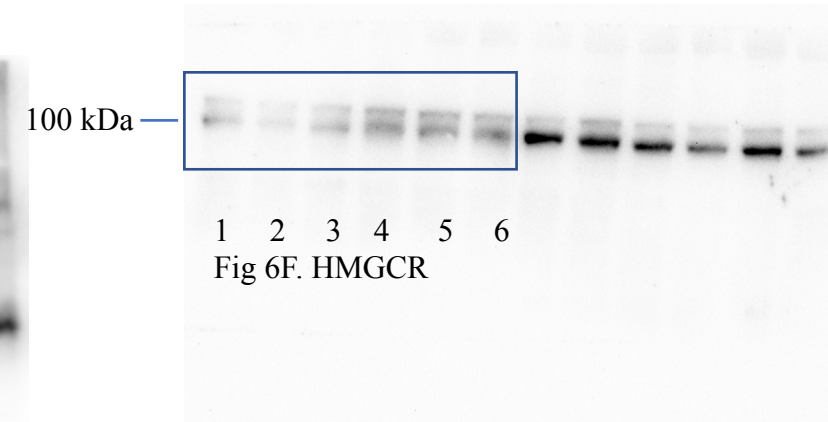

Fig 6F. HMGCR. The membrane was blotted with a rabbit anti-HMGCR antibody (abcam). Antibody binding was detected using HRP-conjugated secondary antibodies. SDS-PAGE (10%).

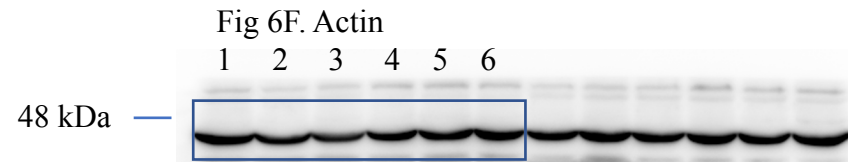

Fig 6F. Actin. The membrane was cut into halves. The bottom part was blotted with a rabbit anti-actin antibody (Bioss). Antibody binding was detected using HRP-conjugated secondary antibodies. SDS-PAGE (10 %).

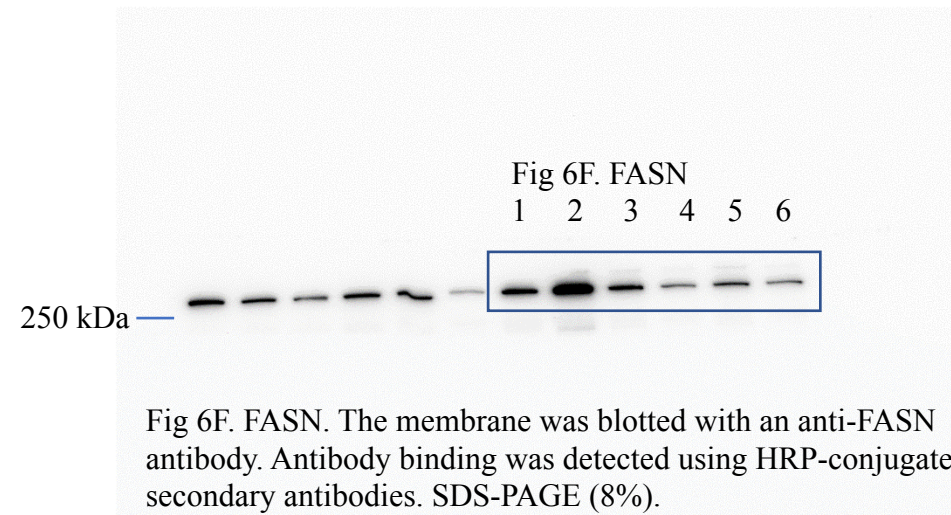

Fig 6F. FASN. The membrane was blotted with an anti-FASN antibody. Antibody binding was detected using HRP-conjugated secondary antibodies. SDS-PAGE (8%).

# Figure 7C

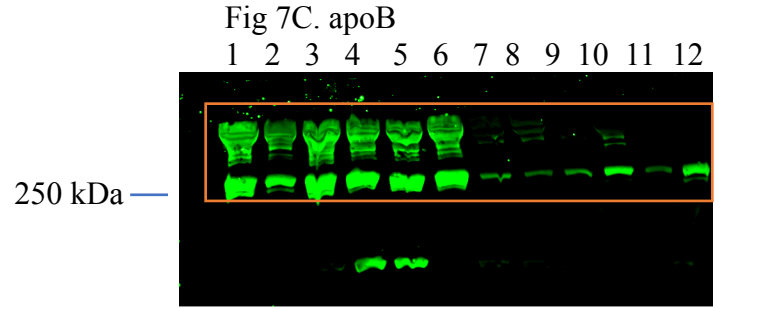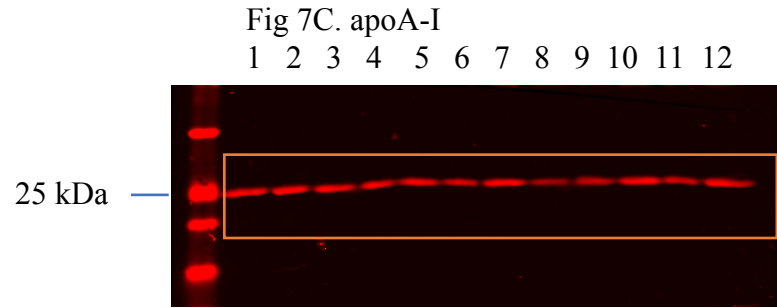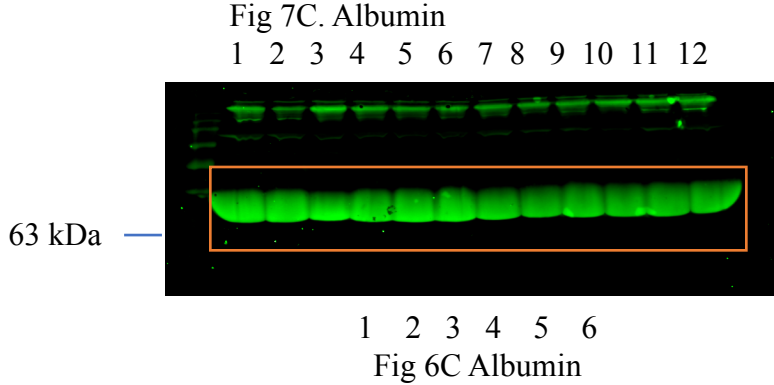

# Figure 7D

Fig. 7D apoB

1 2 3 4 5 6

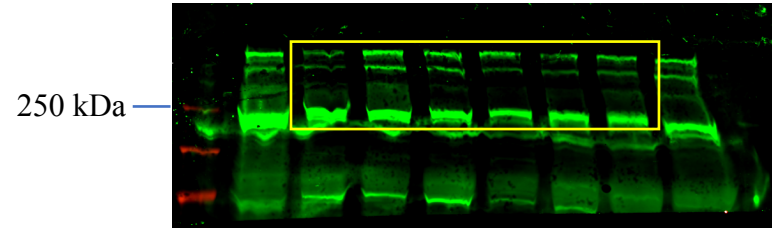

Fig. 7D apoA-I

1 2 3 4 5 6

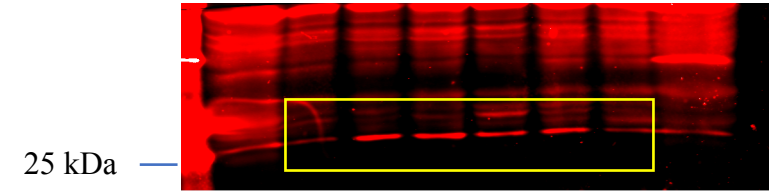

Fig. 7D Albumin

1 2 3 4 5 6

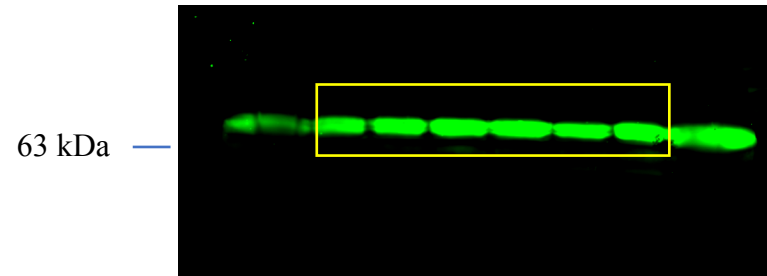

Fig. 7D Calnexin

1 2 3 4 5 6

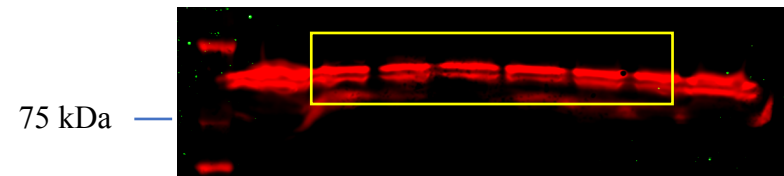



# Figure 8F

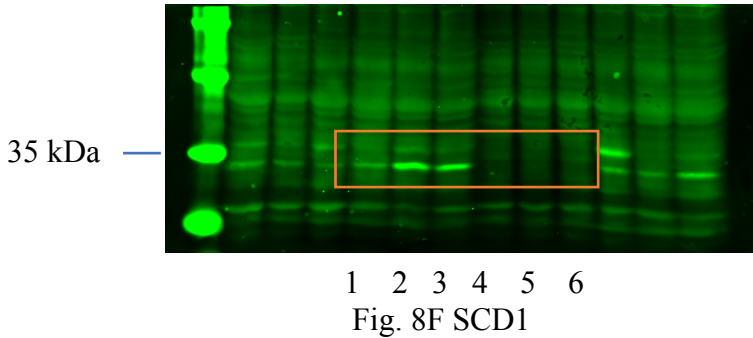

Fig. 8F Calnexin 1 2 3 4 5 6

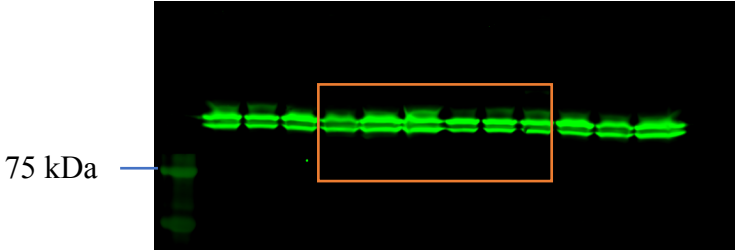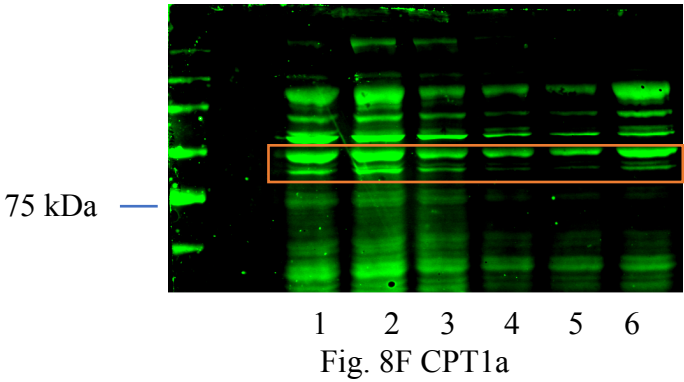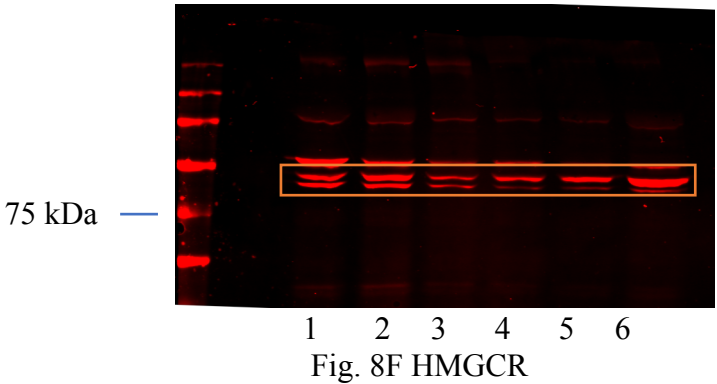

Supplement: mmc1.pdf [file mmc1.pdf]
